# Supplementary figures and images for: Hemoxygenase-1 Promotes Head and Neck Cancer Cell Viability
Source: MDPI journal article supplement (doi:10.3390/antiox11102077), 2022-10-21

**A**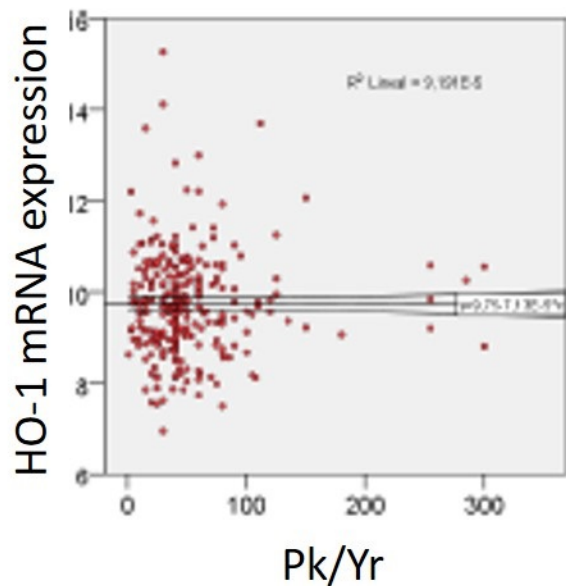**B**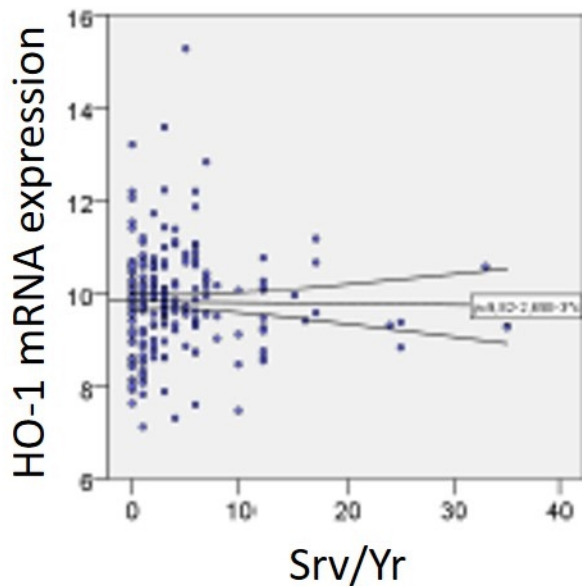

Figure S1: HO-1 mRNA expression and risk factors, tobacco and alcohol.

Supplement: s1 [file s1]
